# Supplementary material for: Fabrication of Silver Nanoparticles Dispersed in Palm Oil Using Laser Ablation
Source: MDPI journal article supplement (doi:10.3390/ijms11114764), 2010-11-22
Supplement: s1 [file s1]

*Correction*

## **Fabrication of Silver Nanoparticles Dispersed in Palm Oil Using Laser Ablation**

*Published: 25 November 2010*

---

A new version of the paper [1] was uploaded today. We found that in the abstract (Line 4) the phrase “The palm coconut oil allowed formation” should be corrected as “The palm oil allowed formation”. We would like to apologize for any inconvenience caused to our readers.

*Int. J. Mol. Sci.* Editorial Office

### **Reference**

1. Zamiri, R.; Zakaria, A.; Ahangar, H.A.; Sadrolhosseini, A.R.; Mahdi, M.A. Fabrication of Silver Nanoparticles Dispersed in Palm Oil Using Laser Ablation. *Int. J. Mol. Sci.* **2010**, *11*, 4764–4770.
